# Supplementary material
Source: PubMed Central journal article supplement (PMC3169667)
Supplement: supp_kxr001_biosts-09017-File002.pdf [file supp_kxr001_biosts-09017-File002.pdf]

*Biostatistics* (2010), **1**, 1, pp. 1–9

doi:10.1093/biostatistics/bio000

**Supplementary Materials for “Comparing costs  
associated with Risk Stratification Rules for  $t$ -year  
Survival”**

Tianxi Cai

*Department of Biostatistics, Harvard University, Boston, MA, USA*

tcai@hsph.harvard.edu

LU TIAN

*Department of Health Research & Policy, Stanford University, Stanford, CA, USA*

lutian@stanford.edu

DONALD M. LLOYD-JONES

*Department of Preventive Medicine, Northwestern University, Chicago, IL, USA*

## APPENDIX

## A. OPTIMAL RISK STRATIFICATION RULE

To show the optimality of  $R^{opt}(z)$ , we note that an optimal rule assigns subjects with  $Z = z$  to the  $k$ th risk category if and only if for any  $l \neq k$ ,

$$\mathfrak{C}_z(k) = E \{Y c_{1k} + (1 - Y) c_{0k} \mid Z = z\} \leq E \{Y c_{1l} + (1 - Y) c_{0l} \mid Z = z\} = \mathfrak{C}_z(l).$$

This implies that for any  $l \neq k$ ,

$$\mu_0(z) c_{1k} + \{1 - \mu_0(z)\} c_{0k} \leq \mu_0(z) c_{1l} + \{1 - \mu_0(z)\} c_{0l}$$

and thus  $\mu_0(z) \{(c_{1k} - c_{0k}) - (c_{1l} - c_{0l})\} \leq c_{0l} - c_{0k}$ . Coupled with the fact that  $c_{1k} - c_{0k} > c_{1l} - c_{0l}$ ,  $l > k$  and  $c_{1k} - c_{0k} < C_{l'}^{(1)} - c_{0l}$ ,  $l' < k$ , we have  $P_{kl'} \leq \mu_0(z) \leq P_{kl}$ , for any pair of  $(l', l)$  such that  $l' < k < l$ . It follows that the optimal rule would assign a subject with  $Z = z$  to the  $k$ th category if and only if  $\max_{0 \leq l \leq k-1} P_{kl} \leq \mu_0(z) \leq \min_{k+1 \leq l \leq K+1} P_{kl}$ . If  $\max_{0 \leq l \leq k-1} P_{kl} \leq \mu_0(z) \leq \min_{k+1 \leq l \leq K+1} P_{kl}$  and  $\max_{0 \leq l \leq k'-1} P_{k'l} \leq \mu_0(z) \leq \min_{k'+1 \leq l \leq K+1} P_{k'l}$ , then the expected costs associated with assigning subjects with  $\mu_0(z)$  to the  $k$ th category and to  $k'$ th category are equal. For such settings, without loss of generality, one may assign such subjects to category  $\min(k, k')$ . This concludes that  $R^{opt}(z)$  minimizes  $\mathfrak{C}_z(R)$ .

## B. ASYMPTOTIC DERIVATION FOR THE ESTIMATED EXPECTED COST

We assume that the true conditional risk function  $\mu_0(z)$  is continuously differentiable with derivative function  $d\mu_0(z)/dz$  bounded away from 0 almost everywhere. Through-

out, we also assume that the bandwidth  $h = O(n^{-\nu})$  with  $1/5 \leq \nu < 1/2$ . Let  $\tilde{\mathfrak{C}}(m, H) = n^{-1} \sum_{i=1}^n \mathfrak{C}_i(m, H)$ ,  $\mathfrak{C}(m, H) = E\{\tilde{\mathfrak{C}}(m, H)\}$ , where  $V_i(t) = I(X_i \leq t)\delta_i + I(X_i > t)$  and  $\mathfrak{C}_i(m, H) = \eta\{Y_i, m(Z_i)\}V_i(t)/H(t \wedge X_i)$ . Then  $\mathfrak{C}(m) = \mathfrak{C}(m, G)$  and  $\tilde{\mathfrak{C}}(m) = \tilde{\mathfrak{C}}(m, \hat{G})$ . We first write

$$\begin{aligned} \left| n^{-1} \sum_{i=1}^n \mathfrak{C}_i(\tilde{\mu}, \hat{G}) - \mathfrak{C}(\mu_0) \right| &\leq \left| n^{-1} \sum_{i=1}^n \left\{ \mathfrak{C}_i(\tilde{\mu}, \hat{G}) - \mathfrak{C}_i(\mu_0, G) \right\} \right| \\ &\quad + \left| n^{-1} \sum_{i=1}^n \mathfrak{C}_i(\mu_0, G) - \mathfrak{C}(\mu_0) \right|. \end{aligned}$$

By a law of large numbers,  $n^{-1} \sum_{i=1}^n \mathfrak{C}_i(\mu_0, G) - \mathfrak{C}(\mu_0) = o_p(1)$ . Thus, a sufficient condition for the consistency of  $\tilde{\mathfrak{C}}(\tilde{\mu})$  is that  $n^{-1} \sum_{i=1}^n \left\{ \mathfrak{C}_i(\tilde{\mu}, \hat{G}) - \mathfrak{C}_i(\mu_0, G) \right\} = o_p(1)$ . To show that this condition holds, we note that since  $\eta\{Y_i, m(Z_i)\}$  is bounded by a constant  $\eta_0$ ,  $|n^{-1} \sum_{i=1}^n \left\{ \mathfrak{C}_i(\tilde{\mu}, \hat{G}) - \mathfrak{C}_i(\tilde{\mu}, G) \right\}| \leq n^{-1} \sum_{i=1}^n \eta_0 |\hat{G}(t \wedge X_i)^{-1} - G(t \wedge X_i)^{-1}|$ . This and the uniform consistency of  $\hat{G}(\cdot)$  (Kalbfleisch and Prentice, 2002) imply that  $n^{-1} \sum_{i=1}^n \left\{ \mathfrak{C}_i(\tilde{\mu}, \hat{G}) - \mathfrak{C}_i(\tilde{\mu}, G) \right\} = o_p(1)$ . It remains to show that  $n^{-1} \sum_{i=1}^n \left\{ \mathfrak{C}_i(\tilde{\mu}, G) - \mathfrak{C}_i(\mu_0, G) \right\} = o_p(1)$ . This convergence holds if for any given non-negative bounded function  $\xi(\cdot, \cdot)$ ,

$$\tilde{\varepsilon}_{\xi k} = n^{-1} \sum_{i=1}^n \left\{ I(\tilde{\mu}(Z_i) > p_k) - I(\mu_0(Z_i) > p_k) \right\} \xi(X_i, D_i) = o_p(1), \quad (\text{B.1})$$

To show (B.1), we let  $A_\xi(u) = E[I\{\mu_0(Z_i) > u\}\xi(X_i, D_i)]$ ,  $\tilde{\varepsilon}_\mu = \sup_z |\tilde{\mu}(z) - \mu_0(z)|$ ,  $\tilde{\varepsilon}_A = \sup_u |n^{-1} \sum_{i=1}^n I\{\mu_0(Z_i) > u\}\xi(X_i, D_i) - A_\xi(u)|$ , and note that  $|\tilde{\varepsilon}_{\xi k}| \leq n^{-1} \sum_{i=1}^n I\{p_k + \tilde{\varepsilon}_\mu \geq \mu_0(Z_i) > p_k - \tilde{\varepsilon}_\mu\} \xi(X_i, D_i) \leq 2\tilde{\varepsilon}_A + |A_\xi(p_k + \tilde{\varepsilon}_\mu) - A_\xi(p_k - \tilde{\varepsilon}_\mu)|$ . By a uniform law of large numbers (Pollard, 1990),  $\tilde{\varepsilon}_A = o_p(1)$ . On the other hand, using the same arguments as given in Cai et al (2008), we have  $\tilde{\varepsilon}_\mu = o_p(n^{-1/4})$ . This, together

with the continuity of  $A_\xi(u)$ , implies that  $\tilde{\epsilon}_{\xi k} = o_p(1)$  and hence the consistency of  $\tilde{\mathfrak{C}}(\tilde{\mu})$ .

To derive the asymptotic distribution for  $\tilde{\mathbb{W}} = n^{\frac{1}{2}}\{\tilde{\mathfrak{C}}(\tilde{\mu}) - \mathfrak{C}(\mu_0)\} = n^{\frac{1}{2}}\{\tilde{\mathfrak{C}}(\tilde{\mu}, \hat{G}) - \mathfrak{C}(\mu_0, G)\}$ , we write  $\tilde{\mathbb{W}} = \tilde{\mathbb{W}}_1 + \tilde{\mathbb{W}}_2 + \tilde{\mathbb{W}}_3$ , where  $\tilde{\mathbb{W}}_1 = n^{\frac{1}{2}}\{\tilde{\mathfrak{C}}(\tilde{\mu}, \hat{G}) - \tilde{\mathfrak{C}}(\tilde{\mu}, G)\}$ ,  $\tilde{\mathbb{W}}_2 = n^{\frac{1}{2}}\{\tilde{\mathfrak{C}}(\tilde{\mu}, G) - \tilde{\mathfrak{C}}(\mu_0, G)\}$ ,  $\tilde{\mathbb{W}}_3 = n^{\frac{1}{2}}\{\tilde{\mathfrak{C}}(\mu_0, G) - \mathfrak{C}(\mu_0, G)\}$ . For  $\tilde{\mathbb{W}}_1$ , we first note that for  $s \leq t$ ,

$$n^{\frac{1}{2}} \left\{ \frac{G(s)}{\hat{G}(s)} - 1 \right\} \simeq n^{-\frac{1}{2}} \sum_{i=1}^n \int_0^s \frac{dM_i(u)}{\text{pr}(X \geq u)} \quad (\text{B.2})$$

converges weakly to a zero-mean Gaussian process indexed by  $s$  (Kalbfleisch and Prentice, 2002), where  $M_i(u) = I(X_i \leq u, \delta_i = 0) - \int_0^u I(X_i \geq u) d\Lambda_C(u)$  and  $\Lambda_C(\cdot)$  is the cumulative hazard function for the common censoring variable  $C$ . It follows that  $\tilde{\mathbb{W}}_1$  is asymptotically equivalent to

$$n^{-\frac{1}{2}} \sum_{i=1}^n \left\{ \int_0^t \gamma(u) dM_i(u) \right\}, \quad (\text{B.3})$$

where  $\gamma(u) = E[\eta\{Y, \mu_0(Z)\}I(T \geq u)]/\text{pr}(X \geq u)$ .

For  $\tilde{\mathbb{W}}_2$ , we write

$$\begin{aligned} \tilde{\mathbb{W}}_2 &= n^{-\frac{1}{2}} \sum_{i=1}^n \sum_{k=1}^{K-1} d_{0k} w_i \{1 - p_k^{-1} Y_i\} [I\{\tilde{\mu}(Z_i) > p_k\} - I\{\mu_0(Z_i) > p_k\}] \\ &= \sum_{k=1}^{K-1} \int [I\{\tilde{\mu}(z) > p_k\} - I\{\mu_0(z) > p_k\}] dn^{1/2} \hat{H}_k(z) \end{aligned}$$

where  $w_i = V_i(t)/G(t \wedge X_i)$  and  $\hat{H}_k(z) = n^{-1} \sum_{i=1}^n d_{0k} w_i \{1 - p_k^{-1} Y_i\} I(Z_i \leq z)$ . By a standard empirical process theory (Pollard, 1990)  $n^{\frac{1}{2}}\{\hat{H}_k(z) - \tilde{H}_k(z)\}$  converges weakly to a zero-mean Gaussian process, where  $\tilde{H}_k(z) = n^{-1} \sum_{i=1}^n d_{0k} \{1 - p_k^{-1} \mu_0(Z_i)\} I(Z_i \leq z)$ . This, together with Lemma 1 of Bilias *and others* (1997), implies that  $\tilde{\mathbb{W}}_2$  is asymp-

totically equivalent to  $\tilde{\varepsilon}_1 + \tilde{\varepsilon}_2$ , where

$$\begin{aligned}\tilde{\varepsilon}_1 &= n^{-\frac{1}{2}} \sum_{i=1}^n \sum_{k=1}^{K-1} d_{0k} \{1 - p_k^{-1} \mu_0(Z_i)\} I\{\tilde{\mu}(Z_i) > p_k, \mu_0(Z_i) \leq p_k\} \\ \tilde{\varepsilon}_2 &= -n^{-\frac{1}{2}} \sum_{i=1}^n \sum_{k=1}^{K-1} d_{0k} \{1 - p_k^{-1} \mu_0(Z_i)\} I\{\tilde{\mu}(Z_i) \leq p_k, \mu_0(Z_i) > p_k\}\end{aligned}$$

It follows from  $\tilde{\varepsilon}_\mu = \sup_z |\tilde{\mu}(z) - \mu_0(z)| = o_p(n^{-1/4})$  that

$$0 \leq \tilde{\varepsilon}_1 \leq n^{-\frac{1}{2}} \sum_{i=1}^n \sum_{k=1}^{K-1} d_{0k} \{1 - p_k^{-1} \mu_0(Z_i)\} [I\{\mu_0(Z_i) > p_k - \tilde{\varepsilon}_\mu\} - I\{\mu_0(Z_i) > p_k\}].$$

Furthermore, the process  $\Gamma(t) = n^{-\frac{1}{2}} \sum_{i=1}^n \sum_{k=1}^{K-1} [d_{0k} \{1 - p_k^{-1} \mu_0(Z_i)\} I\{\mu_0(Z_i) > p_k - t\} - I\{\mu_0(Z_i) > p_k\}] - \{\zeta(\mathbf{p} + t) - \zeta(\mathbf{p})\}$  is stochastic continuous at  $t = 0$ , where

$$\zeta(\bar{\mathbf{p}}) = E \left[ \sum_{k=1}^{K-1} d_{0k} \{1 - p_k^{-1} \mu_0(Z)\} I\{\mu_0(Z) > \bar{p}_k\} \right], \quad \bar{\mathbf{p}} = (\bar{p}_1, \dots, \bar{p}_K)',$$

and  $\mathbf{p} = (p_1, \dots, p_K)'$ . Thus,  $\hat{\varepsilon}_1$  is bounded above by  $\sup_{|t| \leq \hat{\varepsilon}_m} n^{1/2} \{\zeta(\mathbf{p} + t) - \zeta(\mathbf{p})\}$ . Now, since the expected cost function  $\zeta(\bar{\mathbf{p}})$  is minimized at  $\bar{\mathbf{p}} = \mathbf{p}$ ,  $\partial \zeta(\bar{\mathbf{p}}) / \partial \bar{\mathbf{p}} = 0$  when  $\bar{\mathbf{p}} = \mathbf{p}$ . Therefore,  $0 \leq \tilde{\varepsilon}_1 \leq O_p(n^{1/2} \tilde{\varepsilon}_\mu^2)$  and thus  $\tilde{\varepsilon}_1 = o_p(1)$ . Similarly,  $\tilde{\varepsilon}_2 = o_p(1)$ . It follows that  $\tilde{\mathbb{W}}_2 = o_p(1)$ . This, combined with (B.3), implies that  $\tilde{\mathbb{W}} \simeq n^{-\frac{1}{2}} \sum_{i=1}^n \mathbb{W}_i$ , where  $\psi_{\mathbb{W}_i} = \int_0^t \gamma(u) dM_i(u) + \mathfrak{C}_i(\mu_0, G) - \mathfrak{C}(\mu_0, G)$ . By a Central Limit Theorem,  $\tilde{\mathbb{W}}$  converges to a normal with mean 0 and variance  $\sigma^2 = E(\psi_{\mathbb{W}_i}^2)$ .

### C. ASYMPTOTIC PROPERTIES OF $\widehat{\mathbb{C}}(\widehat{\mu}_{\hat{\beta}})$

In this section, we show that  $\widehat{\mathbb{C}}(\widehat{\mu}_{\hat{\beta}})$  converges to  $\mathbb{C}(\mu_{\beta_0})$  in probability as  $n \rightarrow \infty$  and derive the asymptotic distribution for  $\widehat{\mathbb{W}}$ . We assume that  $\mathbf{Z}$  is bounded and  $\mu_\beta(x)$  is con-

tinuously differentiable with respect to both  $\beta$  and  $x$  and  $\partial\mu_{\beta_0}(x)/\partial x$  is bounded away from 0 almost everywhere. Furthermore, we assume that  $\beta_0^\top \mathbf{Z}$  is a continuous random variable with a continuously differentiable density. The consistency of  $\widehat{\mathbb{C}}(\widehat{\mu}_{\widehat{\beta}})$  follows from the same arguments as given in Appendix B provided that  $\widehat{\varepsilon}_m = \sup_{\mathbf{Z}} |\widehat{\mu}_{\widehat{\beta}}(\mathbf{Z}) - \mu_{\beta_0}(\mathbf{Z})| = o_p(n^{-1/4})$ . Thus, it remains to establish the convergence rate of  $\widehat{\varepsilon}_m$ . To this end, we note that

$$\widehat{\varepsilon}_m \leq \sup_x |g_0\{\widehat{\theta}_{\widehat{\beta}}(x)\} - g_0\{\theta_{\beta_0}(x)\}| + \sup_{\mathbf{Z}} |g_0\{\theta_{\beta_0}(\widehat{\beta}^\top \mathbf{Z})\} - g_0\{\theta_{\beta_0}(\beta_0^\top \mathbf{Z})\}|.$$

where  $\theta_{\beta}(x) = g_0^{-1}\{\text{pr}(Y_i = 1 | \beta^\top \mathbf{Z} = x)\}$ . From Uno et al (2007) and Cai et al (2008), we have

$$n^{\frac{1}{2}}(\widehat{\beta} - \beta_0) = n^{-\frac{1}{2}} \sum_{i=1}^n \mathbf{W}_{Bi} + o_p(1) = O_p(1), \quad (\text{C.1})$$

$$\text{and } \sup_x |\widehat{\theta}_{\widehat{\beta}}(x) - \theta_{\beta_0}(x)| = O_p\{(nh)^{-\frac{1}{2}} \log(n)^2\}, \quad (\text{C.2})$$

where

$$\mathbf{W}_{Bi} = \mathbb{A}^{-1} \left[ w_i \mathbf{Z}_i \{Y_i - g(\beta_0^\top \mathbf{Z}_i)\} + \int_0^t \gamma_B(u) dM_i(u) \right],$$

$$\mathbb{A} = E\{\dot{g}(\beta_0^\top \mathbf{Z}_i) \mathbf{Z}_i \mathbf{Z}_i^\top\}, \quad \gamma_B(u) = \frac{E[\mathbf{Z}_i \{Y_i - g(\beta_0^\top \mathbf{Z}_i)\} I(T_i \geq u)]}{\text{pr}(X \geq u)},$$

and  $\dot{g}(x) = dg(x)/dx$ . This, together with the boundedness of  $\partial\mu_{\beta_0}(x)/\partial x$  and  $\mathbf{Z}$ , implies that

$$\widehat{\varepsilon}_m \leq O_p\{(nh)^{-\frac{1}{2}} \log(n)^2 + n^{-\frac{1}{2}}\} = o_p(n^{-1/4}),$$

since  $h^{-1} = o_p(n^{1/2})$ . The consistency of  $\widehat{\mathbb{C}}(\widehat{\mu}_{\widehat{\beta}})$  follows immediately.

To approximate the distribution of  $\widehat{\mathbb{W}} = n^{\frac{1}{2}}\{\widehat{\mathbb{C}}(\widehat{\mu}_{\widehat{\beta}}) - \mathbb{C}(\mu_{\beta_0})\}$ , we write  $\widehat{\mathbb{W}} = \widehat{\mathbb{W}}_1 + \widehat{\mathbb{W}}_2 + \widehat{\mathbb{W}}_3$ , where  $\widehat{\mathbb{W}}_1 = n^{\frac{1}{2}}\{\widehat{\mathbb{C}}(\widehat{\mu}_{\widehat{\beta}}, \widehat{G}) - \widehat{\mathbb{C}}(\widehat{\mu}_{\widehat{\beta}}, G)\}$ ,  $\widehat{\mathbb{W}}_2 = n^{\frac{1}{2}}\{\widehat{\mathbb{C}}(\widehat{\mu}_{\widehat{\beta}}, G) - \widehat{\mathbb{C}}(\mu_{\beta_0}, G)\}$ ,

$$\widehat{\mathbb{W}}_3 = n^{\frac{1}{2}} \{ \widehat{\mathbb{C}}(\mu_{\beta_0}, G) - \mathbb{C}(\mu_{\beta_0}) \},$$

$$\widehat{\mathbb{C}}(\mu, G) = n^{-1} \sum_{i=1}^n \mathbb{C}_i(\mu, H), \quad \text{and} \quad \mathbb{C}_i(\mu, H) = \frac{V_i(t) \eta \{ Y_i, \mu(\mathbf{Z}_i) \}}{H(t \wedge X_i)}.$$

Following similar arguments as given in Appendix B with the uniform consistency of  $\widehat{\mu}_{\widehat{\beta}}(x)$  given in (C.2), we have

$$\widehat{\mathbb{W}}_1 = n^{-\frac{1}{2}} \sum_{i=1}^n \int_0^t \gamma_{\mathbb{C}}(u) dM_i(u) + o_p(1)$$

where  $\gamma_{\mathbb{C}}(u) = E[\eta \{ Y_i, \mu_{\beta_0}(\mathbf{Z}_i) \} I(T \geq u)] / \text{pr}(X \geq u)$ . Next, we express  $\widehat{\mathbb{W}}_2$  as

$$\begin{aligned} & \sum_{k=1}^{K-1} \left( \int I[g_0 \{ \widehat{\theta}_{\widehat{\beta}}(x) \} > p_{k-1}] d\widehat{H}_k(x; \widehat{\beta}) - \int I[g_0 \{ \theta_{\beta_0}(x) \} > p_{k-1}] d\widehat{H}_k(x; \beta_0) \right) \\ &= \sum_{k=1}^{K-1} \int \left( I[g_0 \{ \widehat{\theta}_{\widehat{\beta}}(x) \} > p_{k-1}] - I[g_0 \{ \theta_{\beta_0}(x) \} > p_{k-1}] \right) dn^{\frac{1}{2}} \widehat{H}_k(x; \widehat{\beta}) \\ & \quad + \sum_{k=1}^{K-1} \int I[g_0 \{ \theta_{\beta_0}(x) \} > p_{k-1}] dn^{\frac{1}{2}} \left\{ \widehat{H}_k(x; \widehat{\beta}) - \widehat{H}_k(x; \beta_0) \right\} \end{aligned}$$

where  $\widehat{H}_k(x; \beta) = n^{-1} \sum_{i=1}^n d_{0k} w_i (1 - Y_i p_k^{-1}) I(\beta^T \mathbf{Z}_i \leq x)$ . It follows from the standard empirical process theory (Pollard, 1990) and the convergence of  $n^{\frac{1}{2}}(\widehat{\beta} - \beta_0)$  given in (C.1) that  $n^{\frac{1}{2}} \{ \widehat{H}_k(x; \widehat{\beta}) - \widetilde{H}_k(x; \beta_0) \}$  converges weakly to a zero mean Gaussian process, where  $\widetilde{H}_k(x; \beta_0) = n^{-1} \sum_{i=1}^n d_{0k} w_i \{ 1 - \mu_{\beta_0}(\mathbf{Z}_i) p_k^{-1} \} I(\beta_0^T \mathbf{Z}_i \leq x)$ . This, together with same arguments as given in Appendix B, implies that

$$\sum_{k=1}^{K-1} \int \left( I[g_0 \{ \widehat{\theta}_{\widehat{\beta}}(x) \} > p_{k-1}] - I[g_0 \{ \theta_{\beta_0}(x) \} > p_{k-1}] \right) dn^{\frac{1}{2}} \widehat{H}_k(x; \widehat{\beta}) = o_p(1)$$

Furthermore, let  $\bar{H}_k(x; \boldsymbol{\beta}) = E\{\widehat{H}_k(x; \boldsymbol{\beta})\}$ . It follows from the functional central limit theorem (Pollard, 1990) that  $n^{\frac{1}{2}}\{\widehat{H}_k(x; \boldsymbol{\beta}) - \bar{H}_k(x; \boldsymbol{\beta})\}$  converges weakly to a zero mean Gaussian process in  $(x, \boldsymbol{\beta})$  and thus is equicontinuous in  $\boldsymbol{\beta}$ . Combining this with the expansion for  $\widehat{\boldsymbol{\beta}}$  given in (C.1), we have

$$n^{\frac{1}{2}}\{\widehat{H}_k(x; \widehat{\boldsymbol{\beta}}) - \widehat{H}_k(x; \boldsymbol{\beta}_0)\} = \mathbf{A}_k(x; \boldsymbol{\beta}_0)^\top n^{\frac{1}{2}}(\widehat{\boldsymbol{\beta}} - \boldsymbol{\beta}_0) + o_p(1) = n^{-\frac{1}{2}} \sum_{i=1}^n \mathbf{W}_{Bi}^\top \mathbf{A}_k(x; \boldsymbol{\beta}_0)$$

$\mathbf{A}_k(x; \boldsymbol{\beta}) = \partial \bar{H}_k(x; \boldsymbol{\beta}) / \partial \boldsymbol{\beta}$ . It follows that

$$\widehat{\mathbb{W}}_2 = n^{-\frac{1}{2}} \sum_{i=1}^n \mathbf{W}_{Bi}^\top \left( \sum_{k=1}^{K-1} \int I[g_0\{\theta_{\boldsymbol{\beta}_0}(x)\} > p_{k-1}] d\mathbf{A}_k(x; \boldsymbol{\beta}_0) \right) + o_p(1).$$

Therefore,  $\widehat{\mathbb{W}} = n^{-\frac{1}{2}} \sum_{i=1}^n \zeta_{\mathbb{W}i} + o_p(1)$ , where

$$\begin{aligned} \zeta_{\mathbb{W}i} &= \int_0^t \gamma_{\mathbb{C}}(u) dM_i(u) + \mathbf{W}_{Bi}^\top \sum_{k=1}^{K-1} \int I[g_0\{\theta_{\boldsymbol{\beta}_0}(x)\} > p_{k-1}] d\mathbf{A}_k(x; \boldsymbol{\beta}_0) \\ &\quad + \mathbb{C}_i(\mu_{\boldsymbol{\beta}_0}, G) - \mathbb{C}(\mu_{\boldsymbol{\beta}_0}). \end{aligned} \tag{C.3}$$

Then it follows from a central limit theorem that  $\widehat{\mathbb{W}}$  converges in distribution to a normal with variance  $E(\zeta_{\mathbb{W}i}^2)$ .

## REFERENCES

- BILIAS, YANNIS, GU, MINGGAO AND YING, ZHILIANG. (1997). Towards a general asymptotic theory for Cox model with staggered entry. *The Annals of Statistics* **25**(2), 662–682.
- KALBFLEISCH, J. D. AND PRENTICE, ROSS L. (2002). *The Statistical Analysis of Failure Time Data*. John Wiley & Sons.
- POLLARD, D. (1990). *Empirical Processes: Theory and Applications*. Hayward, CA: Institute of Mathematical Statistics.
